# Supplementary material for: Enhancing the photocatalytic performance of a rutile unit featuring a titanium-oxide cluster by Pb2+ doping
Source: Royal Society of Chemistry journal article supplement (doi:10.1039/d3dt03865c), 2024-01-01
Supplement: d3dt03865c1.pdf [file d3dt03865c1.pdf]

Supporting Information

## Titanium–Oxide Cluster with Rutile Unit Doped Divalent Lead Ions for Efficient Photocatalytic Applications

*Amir Said<sup>#,a</sup>, Guanjie Chen<sup>#,a</sup>, Guanyun Zhang,<sup>\*a</sup> Dexin Wang,<sup>a</sup> Yanshu Liu,<sup>a</sup> Fangfang Gao,<sup>a</sup>  
Guo Wang,<sup>b</sup> Chen–Ho Tung<sup>a</sup> and Yifeng Wang<sup>\*a</sup>*

*Email: [guanyzhang@sdu.edu.cn](mailto:guanyzhang@sdu.edu.cn); [yifeng@sdu.edu.cn](mailto:yifeng@sdu.edu.cn).*

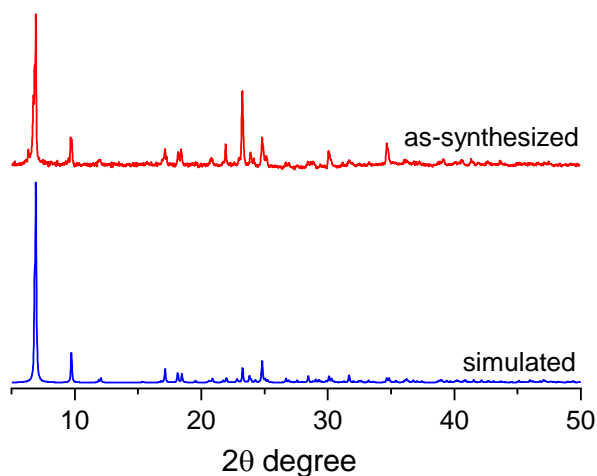

**Fig. S1** Powder X-ray diffraction and simulated XRD pattern of  $\text{Ti}_{12}\text{Pb}_2$ .

**Discussion:** The phase stability of  $\text{Ti}_{12}\text{Pb}_2$  was confirmed by powder XRD analysis. It can be seen from the PXRD spectra that the experimentally obtained PXRD data are consistent with the simulated spectra obtained from the crystal structure of  $\text{Ti}_{12}\text{Pb}_2$ .

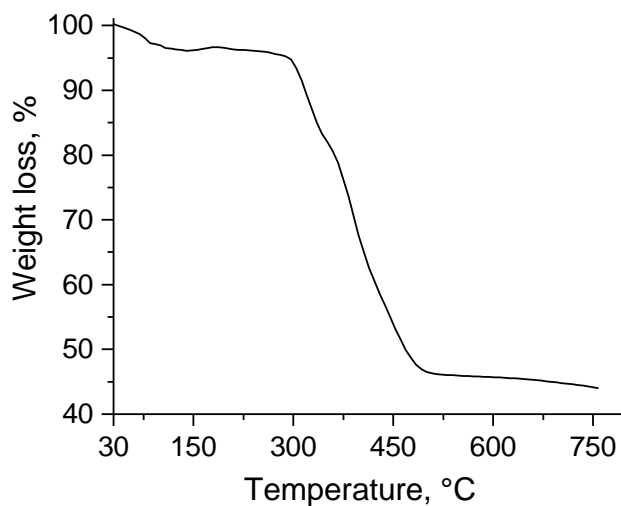

**Fig. S2** Thermal decomposition analysis of crystalline  $\text{Ti}_{12}\text{Pb}_2$ .

**Discussion:** Thermogravimetric analysis (TGA) of the crystalline sample revealed that the  $\text{Ti}_{12}\text{Pb}_2$  cluster structure could be preserved up to 430 °C, although some disordered ligand molecules might be lost before the cluster decomposition.

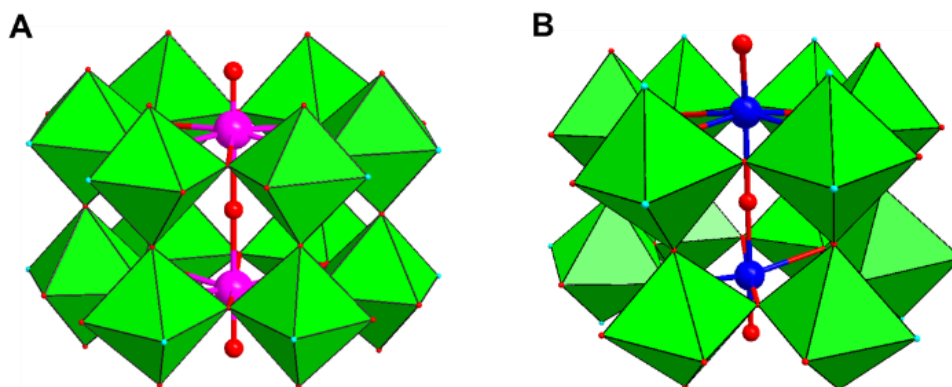

**Fig. S3** Core structural of (A)  $\text{Ti}_{12}\text{Pb}_2$  and (B)  $\text{Ti}_{14}$ . Color scheme: green polyhedral,  $\text{TiO}_5\text{N}$ ; purple, Pb; blue, Ti; red, O; and cyan, N. The ligands are omitted for clarity.

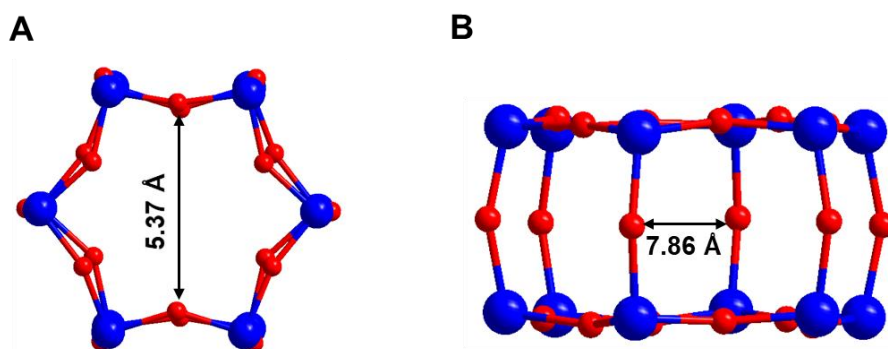

**Fig. S4** Ball-and-stick view of the  $\text{Ti}_{12}\text{O}_{18}$  framework. Color scheme: blue, Ti; and red, O.

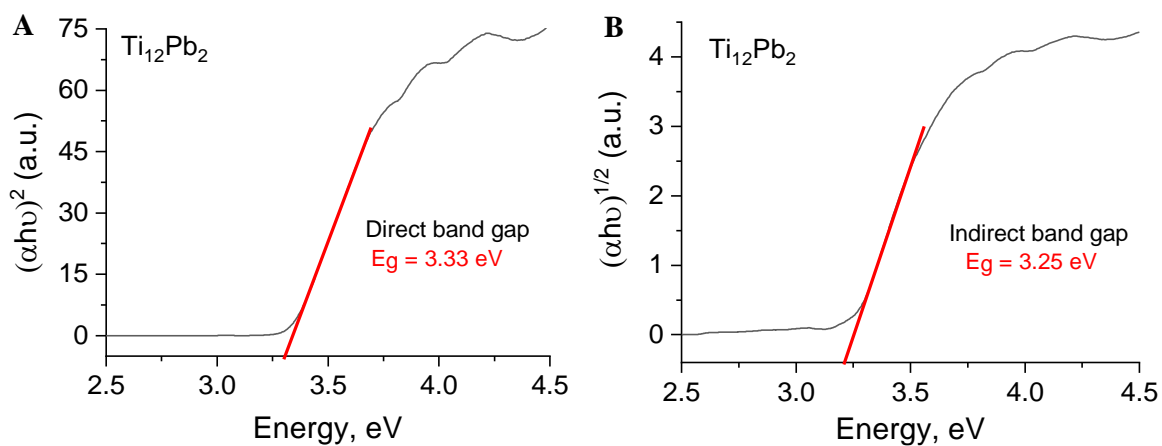

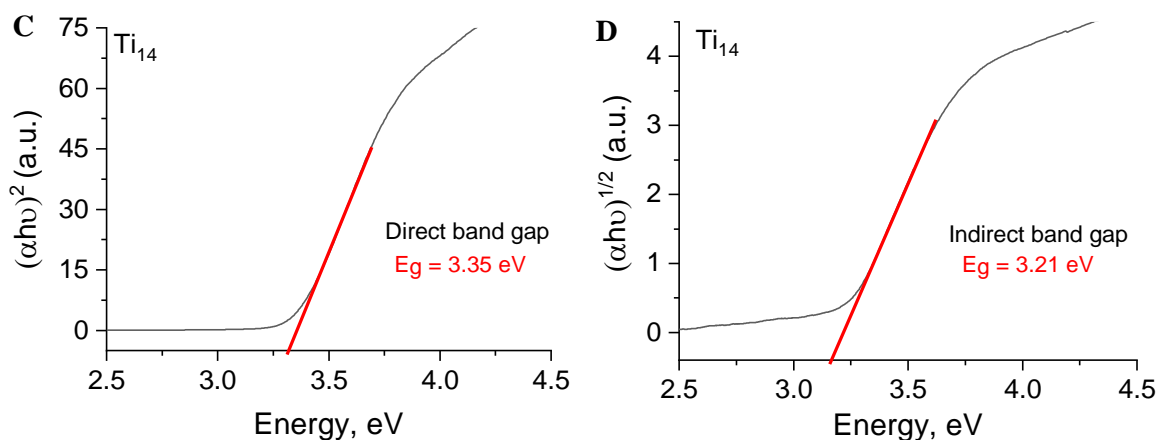

**Fig. S5** Calculations of the direct and indirect bandgap energies values based on solid-state UV-vis diffuse reflectance spectra of  $\text{Ti}_{12}\text{Pb}_2$  and  $\text{Ti}_{14}$ .

**Discussion:** The Kubelka-Munk function for calculation of the bandgap:

$$(\alpha h\nu)^{1/n} = A(h\nu - E_g)$$

Here,  $\alpha$  is the absorption coefficient,  $h$  is the Planck constant;  $\nu$  is frequency;  $A$  is constant; and  $E_g$  is the bandgap value of the semiconductor.

The index  $n$  is directly related to the type of semiconductor:

For direct bandgap:  $n = 1/2$ ; for indirect bandgap:  $n = 2$ .

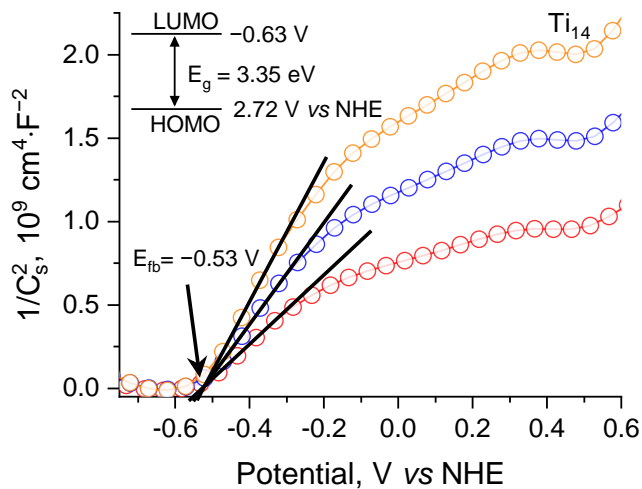

**Fig. S6** The Mott-Schottky plot of  $\text{Ti}_{14}$  at different frequencies (the inset is the diagram of the HOMO-LUMO energy level).

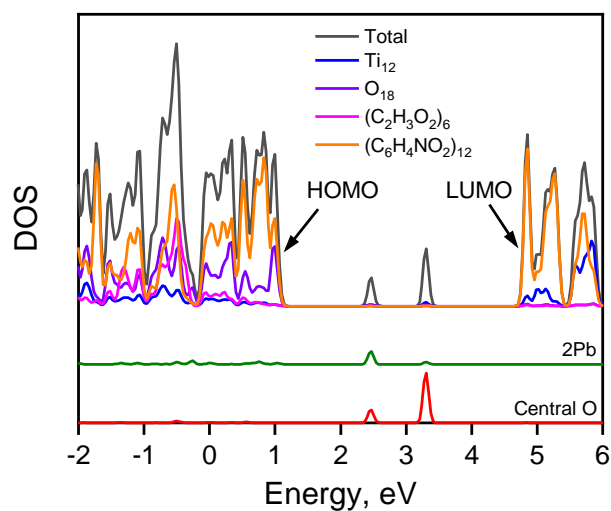

**Figure S7.** The density of state (DOS) plots of  $Ti_{12}Pb_2$ .

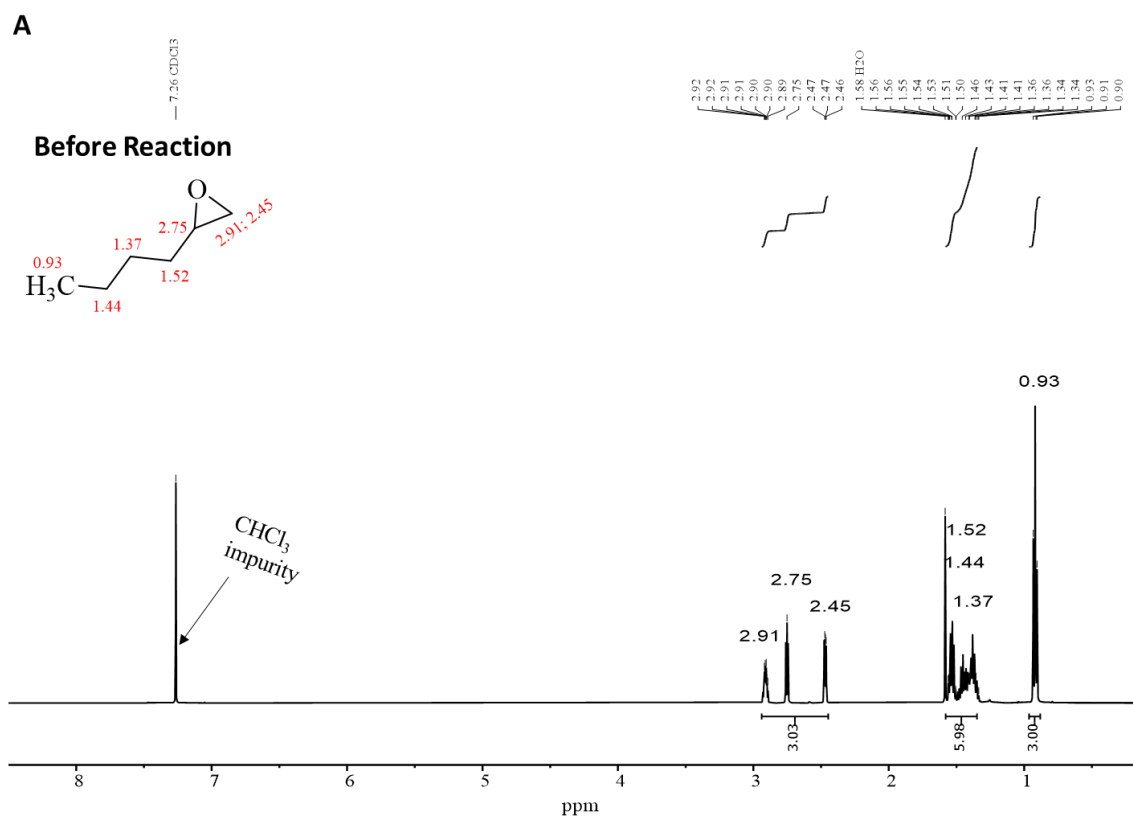

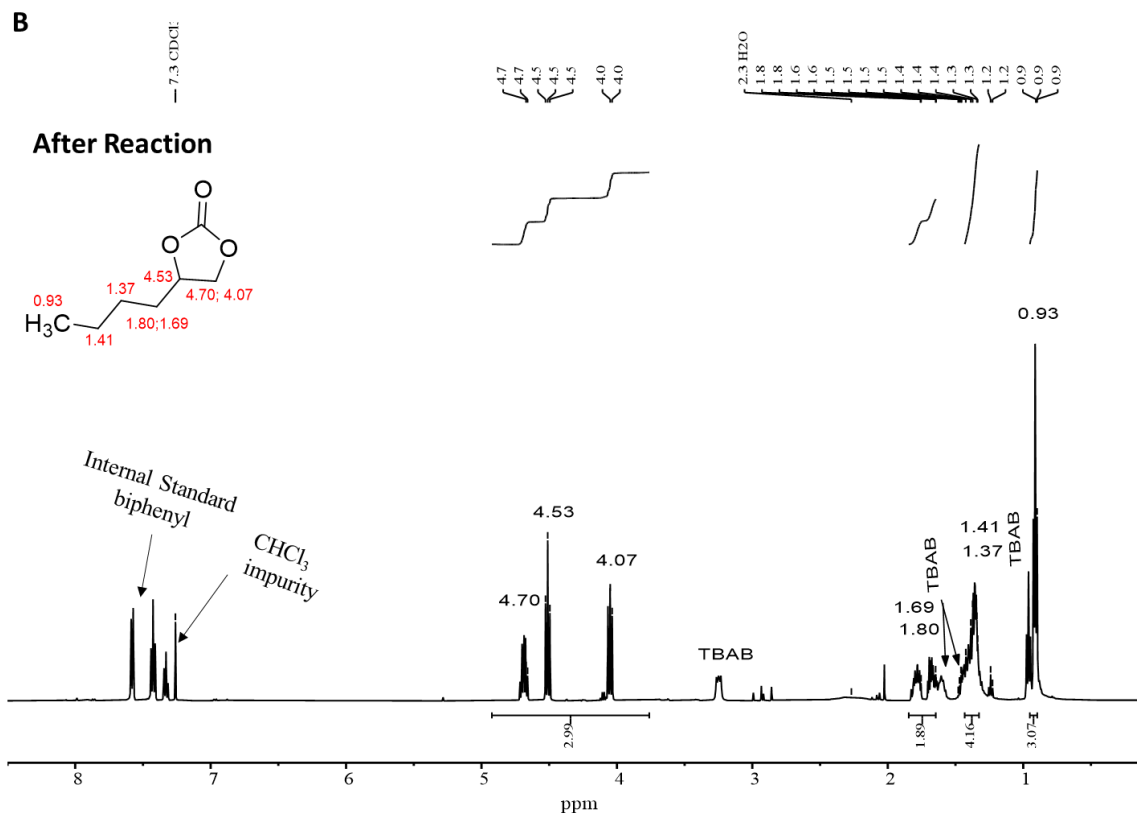

**Fig. S8** <sup>1</sup>H NMR spectra of CO<sub>2</sub> cycloaddition to epoxide before and after the catalytic reaction.

**Discussion:** The <sup>1</sup>H NMR spectra were measured using an Avance-400 MHz NMR spectrometer (Bruker, Switzerland) at room temperature using chloroform-d as the deuterated solvent. The <sup>1</sup>H NMR spectra show that the epoxide at 2.45, 2.75 and 2.91 ppm were observed before the reaction (Figure S8A). After the reaction, the peaks of epoxide at 2.45, 2.75 and 2.91 ppm probably diminished along with the production of new broad peaks of cyclic carbonate at 4.07, 4.53 and 4.70 ppm (Figure S8B). It shows that epoxide conversion into cyclic carbonate approached near completion after 24 h under simulated light irradiation in CO<sub>2</sub> atm at 20 °C.

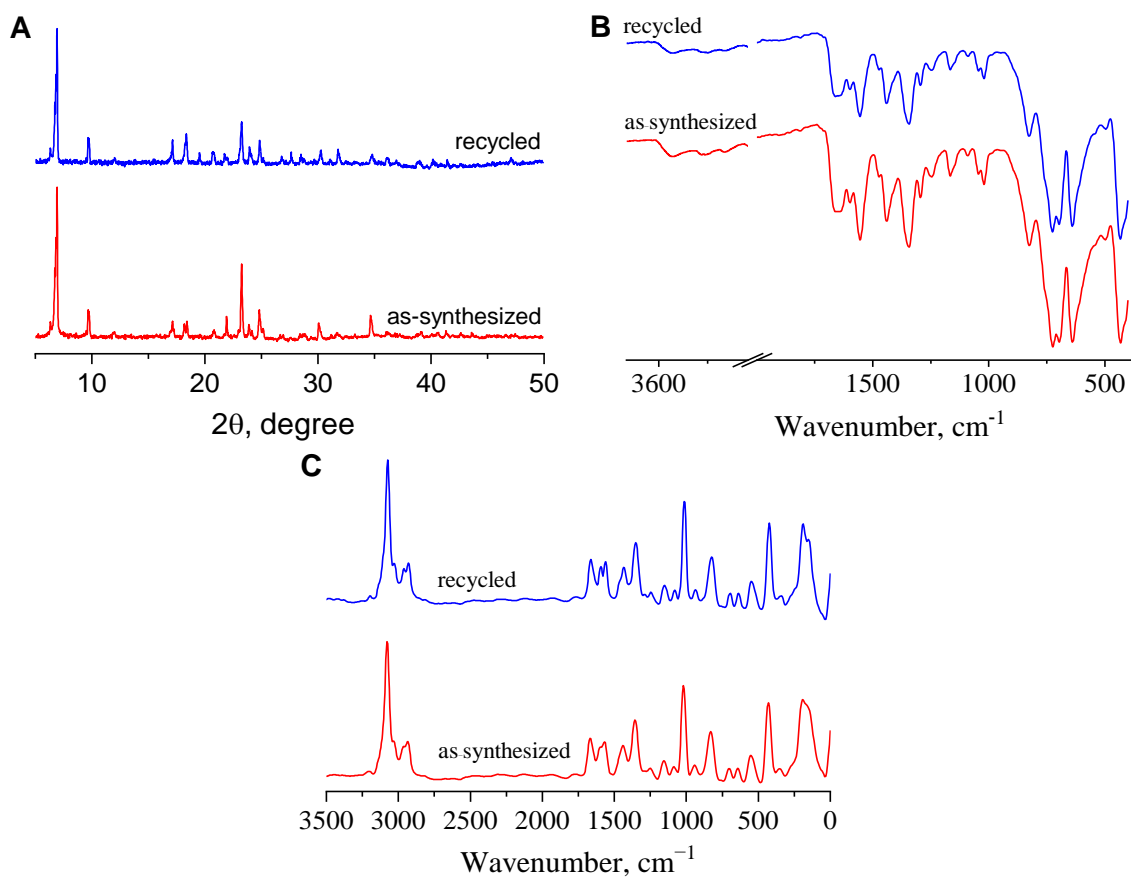

**Fig. S9** (A) The PXRD patterns, (B) FTIR analysis, and (C) Raman analysis of the  $\text{Ti}_{12}\text{Pb}_2$  as-synthesized and recycled after photocatalytic  $\text{CO}_2$  cycloaddition to epoxide.

**Table S1** Comparison of various catalysts used for the CO<sub>2</sub> cycloaddition to epoxide.

| Catalyst                         | Reaction conditions                                                                                                                            | Time, h | Conv., % | Yield, % | No. of substrate | References                                                      |
|----------------------------------|------------------------------------------------------------------------------------------------------------------------------------------------|---------|----------|----------|------------------|-----------------------------------------------------------------|
| Ti <sub>12</sub> Pb <sub>2</sub> | Catalyst (23 μmol); TBAB (0.5 mmol); epoxide (3 mmol); 1 atm CO <sub>2</sub> ; 20 °C; simulated solar light.                                   | 24 h    | 100      | >99      | 6                | <i>This work</i>                                                |
| Ti <sub>12</sub> Pb <sub>2</sub> | Catalyst (23 μmol); TBAB (0.5 mmol); epoxide (3 mmol); 1 atm CO <sub>2</sub> ; 80 °C; simulated solar light.                                   | 4 h     | 100      | >99      | 6                | <i>This work</i>                                                |
| Zn-NTTA                          | Catalyst (5 μmol); TBAB (0.3 mmol); epoxide (20 mmol); 10 bar CO <sub>2</sub> ; 100 °C.                                                        | 8 h     | -        | 98.2     | 4                | <i>ACS Appl. Mater. Interfaces</i> , <b>2016</b> , 8, 31746-56. |
| Al-N <sub>4</sub> -C             | Catalyst (20 mmol); TBAB (0.8 mmol); epoxide (0.67 mmol); DMF; 1 bar CO <sub>2</sub> ; visible light.                                          | 60 h    | -        | 80       | 5                | <i>Adv. Mater.</i> , <b>2021</b> , 33, 2103186.                 |
| MOF-801 (D)                      | Catalyst (0.6 mol%); TBAB (0.5 mol%); epoxide (19.2 mmol); 0.1 MPa CO <sub>2</sub> ; 80 °C.                                                    | 15 h    | 92.4     | 92.4     | 5                | <i>J. Mate. Chem. A</i> , <b>2022</b> , 10, 10051–10061.        |
| V <sub>8</sub> -1                | Catalyst (2 mol %); TBAB (0.5 mmol, 2.5 mol %); epoxide (28 mmol); CO <sub>2</sub> (0.5 Mpa); 70 °C.                                           | 16 h    | -        | >99      | 6                | <i>J. Am. Chem. Soc.</i> , <b>2019</b> , 141, 19487–19497.      |
| Ni-TCPE1                         | Catalyst (10 μmol; based on Ni); epoxide (20 mmol); TBAB (0.3 mmol); CO <sub>2</sub> (1 MPa), 100 °C.                                          | 12 h    | -        | >99      | 4                | <i>J. Am. Chem. Soc.</i> , <b>2015</b> , 137, 15066–15069.      |
| Mn-MOF                           | Catalyst (10 mg); TBAB (0.028 mmol); epoxide (1.429 mmol); 1 bar CO <sub>2</sub> ; visible-light; 80 °C.                                       | 24 h    | -        | 90       | 6                | <i>ACS Omega</i> , <b>2022</b> , 7, 9958-9963.                  |
| PMo <sub>12</sub> @Zr-Fc MOFs    | catalyst (5 mg, 10.26 wt%); TBAB (0.25 mmol); epoxide (12.5 mmol); 1 atm CO <sub>2</sub> ; 80 °C; 900 rpm.                                     | 8 h     | 80       | 86.77    | 1                | <i>Appl. Catal. B</i> , <b>2021</b> , 296, 120329.              |
| CoPc/TiO <sub>2</sub>            | Catalyst (100 mg); TBAB (0.1 mmol); epoxide (1.0 mmol); 1 bar CO <sub>2</sub> ; solvent (CH <sub>3</sub> CN+MeOH); 20 W white cold LED, 25 °C. | 24 h    | 96.7     | 94       | 7                | <i>ACS Sustain. Chem. Eng.</i> , <b>2018</b> , 6, 7799–7809.    |
| Bi-PCN-224                       | Catalyst (30 mg); TBAB (0.5 mmol); epoxide (4.5 mmol); 1 bar CO <sub>2</sub> ; 300 W Xenon lamp.                                               | 6 h     | >99      | -        | 1                | <i>ACS Catal.</i> , <b>2021</b> , 11, 1988-1994.                |



|                                                                                                        |                                                                                                      |      |     |     |   |                                                                          |
|--------------------------------------------------------------------------------------------------------|------------------------------------------------------------------------------------------------------|------|-----|-----|---|--------------------------------------------------------------------------|
| {Cu <sub>4</sub> [(C <sub>57</sub> H <sub>32</sub> N <sub>12</sub> )(COO) <sub>8</sub> ]} <sub>n</sub> | Catalyst (0.2 mol%); TBAB (0.65 g, 10 mol %); CO <sub>2</sub> (1 atm); r.t.                          | 48 h | -   | 96  | 4 | <i>J. Am. Chem. Soc.</i> , <b>2016</b> , <i>138</i> , 2142–2145.         |
| Au <sub>19</sub> Ag <sub>4</sub> (S-Adm) <sub>15</sub>                                                 | Catalyst (5 mg); TBAB (10 mol%); epoxide (0.3 mmol); 3 ml solvent; 60 °C.                            | 24 h | -   | 78  | 3 | <i>Angew. Chem. Int. Ed.</i> , <b>2021</b> , <i>60</i> , 10573–10576.    |
| IHEP-9                                                                                                 | Catalyst (0.05 mmol); TBAB (0.5 mmol); epoxide (1 mmol); 1 bar CO <sub>2</sub> ; visible-light; r.t. | 12 h | -   | >99 | 5 | <i>Inorg. Chem.</i> , <b>2021</b> , <i>60</i> , 651-659.                 |
| Zr-MOF                                                                                                 | Catalyst (30 mg); TBAB (0.5 mmol); epoxide (4.5 mmol); 1 bar CO <sub>2</sub> ; Xe lamp; r.t.         | 6 h  | >99 | -   | 5 | <i>ACS Catal.</i> <b>2021</b> , <i>11</i> , 1988.                        |
| Ti <sub>18</sub> Bi <sub>4</sub>                                                                       | Catalyst (100 mg); TBAB (0.5 mmol); epoxide (3.0 mmol); 1 bar CO <sub>2</sub> ; Xe lamp, r.t.        | 14 h | 100 | >99 | 6 | <i>ACS Catal.</i> , <b>2022</b> , <i>12</i> , 8202–8213.                 |
| BiNbO <sub>4</sub> /r-GO                                                                               | Catalyst (50 mg); TBAB (9 mg); epoxide (100 μl); CO <sub>2</sub> (1.48 MPa); 353 K.                  | 24 h | -   | 65  | 1 | <i>ACS Sustain. Chem. Engin.</i> , <b>2020</b> , <i>8</i> , 12072-12079. |
| NUC-38Yb                                                                                               | Catalyst (0.5 mol %); TBAB (4 mol%); epoxide (20 mmol); CO <sub>2</sub> (1 atm); 60 °C.              | 10 h | -   | 96  | 8 | <i>ACS Catal.</i> , <b>2021</b> , <i>11</i> , 14916–14925.               |

---
